# Supplementary material
Source: publisher figshare collection journal article supplement (https://frontiersin.figshare.com/ndownloader/files/34640339)
Supplement: Supplementary file [file 34640339]

# Supplementary Material

## 1 DERIVATION OF MIRKAT-MC ASSOCIATION ANALYSIS

### 1.1 MiRKAT-MC for independent data

We developed the score test statistic for MiRKAT-MC using the pseudo-likelihood framework. We take MiRKAT-MCN as an example for demonstration, as MiRKAT-MCO can be developed in a similar way by using the corresponding link function and the cumulative probability. We will address some details of MiRKAT-MCO at the end of this section. Suppose we have  $N$  samples and each of them falls to one of the  $J$  categories. Let  $y_{ji}$ , a binary variable denotes whether the  $i$ -th sample belongs to the  $j$ -th category or not. That is,  $y_{ji} = 1$  means sample  $i$  is of category  $j$  and otherwise,  $y_{ji} = 0$ . We consider the following models

$$\eta_{ji} = \log \frac{\pi_{ji}}{1 - \sum_{j=1}^{J-1} \pi_{ji}} = \alpha_j + \mathbf{x}_i' \boldsymbol{\beta}_j + h_{ji}, \quad (\text{S1})$$

for  $i = 1, \dots, N, j = 1, \dots, J - 1$  and

$$y_{ji} = \pi_{ji} + e_{ji}, \quad (\text{S2})$$

where  $\pi_{ji} = E(y_{ji}|h_{ji})$ ;  $\alpha_j$  is the intercept for category  $j$ ;  $\mathbf{x}_i = (x_{i1}, \dots, x_{iq})'$  is a  $q \times 1$  vector of covariates for sample  $i$ ;  $\boldsymbol{\beta}_j = (\beta_{j1}, \dots, \beta_{jq})'$  is the corresponding  $q \times 1$  vector of regression coefficients for category  $j$ .  $h_{ji}$  represents the effect of microbiome of sample  $i$  on the category  $j$ , with the distribution  $\mathcal{N}(0, \tau K_i)$ , where both  $\tau, K_i \geq 0$ .  $e_{ji}$  is the error term that  $E(e_{ji}|\pi_{ji}) = 0$ ,  $\text{Var}(e_{ji}|\pi_{ji}) = \pi_{ji}(1 - \pi_{ji})$  and  $\text{Cov}(e_{ji}, e_{hi}|\pi_{ji}, \pi_{hi}) = -\pi_{ji}\pi_{hi}$  for  $j \neq h$ . The inverse link function  $f(\cdot)$  of the generalized logit mixed model can be easily calculated as

$$\pi_{ji} = f(\eta_{ji}) = \frac{\exp(\eta_{ji})}{1 + \sum_{j=1}^{J-1} \exp(\eta_{ji})}. \quad (\text{S3})$$

It is approximately linearized by the first-order Taylor series expansion around a particular value  $\bar{\eta}_{ji}$ :

$$f(\eta_{ji}) = f(\bar{\eta}_{ji}) + \frac{\partial f(\bar{\eta}_{ji})}{\partial \bar{\eta}_{ji}}(\eta_{ji} - \bar{\eta}_{ji}). \quad (\text{S4})$$

After doing some simple algebra, we have

$$y_{ji} - f(\bar{\eta}_{ji}) = \bar{d}_{ji}^{-1}(\eta_{ji} - \bar{\eta}_{ji}) + e_{ji}, \quad (\text{S5})$$

where  $\bar{d}_{ji}^{-1} = \frac{\partial f(\bar{\eta}_{ji})}{\partial \bar{\eta}_{ji}} = \frac{\bar{\pi}_{ji}\bar{\pi}_{ji}}{\bar{\pi}_{ji} + \bar{\pi}_{ji}}$ . The working response  $y_{ji}^*$  can be established as

$$y_{ji}^* = \bar{d}_{ji}(y_{ji} - f(\bar{\eta}_{ji})) + \bar{\eta}_{ji} = \eta_{ji} + \bar{d}_{ji}e_{ji}. \quad (\text{S6})$$

Rewrite the model S6 into matrix language

$$\mathbf{y}^* = \mathbf{D}_\pi(\mathbf{y} - \bar{\boldsymbol{\pi}}) + \bar{\boldsymbol{\eta}} = \boldsymbol{\eta} + \mathbf{D}_\pi \mathbf{e} \quad (\text{S7})$$

where  $\boldsymbol{\eta} = \mathbf{X}\boldsymbol{\beta} + \mathbf{h}$ ,  $\mathbf{D}_\pi = \text{diag}(\bar{d}_{11}, \dots, \bar{d}_{1N}, \dots, \bar{d}_{J-1,1}, \dots, \bar{d}_{J-1,N})$ ,

$\mathbf{y} = (y_{11}, \dots, y_{1N}, \dots, y_{J-1,1}, \dots, y_{J-1,N})'$ ,  $\mathbf{y}^*$ ,  $\mathbf{h}$ ,  $\bar{\boldsymbol{\pi}}$ ,  $\bar{\boldsymbol{\eta}}$ ,  $\boldsymbol{\eta}$  and  $\mathbf{e}$  are stacked in the same way as  $\mathbf{y}$ .  $\mathbf{y}^*$  marginally has the normal distribution with mean vector  $\mathbf{X}\boldsymbol{\beta}$  and variance-covariance matrix

$$\mathbf{V} = \mathbf{W}^{-1} + \tau \mathbf{K}^*, \text{ where } \mathbf{X} = \mathbf{I}_{J-1} \otimes \begin{bmatrix} 1 & \mathbf{x}'_1 \\ \vdots & \vdots \\ 1 & \mathbf{x}'_n \end{bmatrix}, \boldsymbol{\beta} = (\alpha_1, \boldsymbol{\beta}'_1, \dots, \alpha_{J-1}, \dots, \boldsymbol{\beta}'_{J-1})', \mathbf{K}^* = \mathbf{I}_{J-1} \otimes \mathbf{K}.$$

$\mathbf{I}_{J-1}$  is a  $(J-1)$ -th order identity matrix and  $\mathbf{K}$  is an  $N \times N$  kernel matrix and  $\mathbf{h} \sim \mathcal{N}(\mathbf{0}, \mathbf{I}_{J-1} \otimes \tau \mathbf{K})$ .  $\mathbf{W} = (\mathbf{D}_\pi \mathbf{V}_\pi \mathbf{D}_\pi)^{-1}$  is the working weight matrix with  $\mathbf{V}_\pi$  being the variance-covariance matrix evaluated at  $\bar{\boldsymbol{\pi}}$ . That is,  $\text{Var}(\mathbf{e}|\bar{\boldsymbol{\pi}}) = \mathbf{V}_\pi$ . The Gaussian log likelihood corresponding to the linear mixed model for  $\mathbf{y}^*$  is the following:

$$l(\boldsymbol{\beta}, \tau \mathbf{K}^*, \mathbf{W}; \mathbf{y}^*) = -\frac{1}{2} \log |\mathbf{V}| - \frac{N \times (J-1)}{2} \log 2\pi - \frac{1}{2} (\mathbf{y}^* - \mathbf{X}\boldsymbol{\beta})' \mathbf{V}^{-1} (\mathbf{y}^* - \mathbf{X}\boldsymbol{\beta}). \quad (\text{S8})$$

The score function in terms of  $\tau$  is

$$U(\boldsymbol{\beta}, \tau \mathbf{K}^*, \mathbf{W}; \mathbf{y}^*) = \frac{1}{2} (\mathbf{y}^* - \mathbf{X}\boldsymbol{\beta})' \mathbf{V}^{-1} \mathbf{K}^* \mathbf{V}^{-1} (\mathbf{y}^* - \mathbf{X}\boldsymbol{\beta}) - \frac{1}{2} \text{tr}[\mathbf{V}^{-1} \mathbf{K}^*], \quad (\text{S9})$$

where  $\text{tr}$  is the trace of matrix. Under the null hypothesis  $H_0 : \tau = 0$ ,  $\mathbf{V}$  is reduced to  $\mathbf{W}^{-1}$ . Discarding the additive  $(\text{tr}[\mathbf{V}^{-1} \mathbf{K}^*])$  and scaling terms  $(\frac{1}{2})$  which will not affect the result of testing, the score test statistic of MiRKAT-MCN for independent data is

$$Q_1 = (\mathbf{y}^* - \mathbf{X}\boldsymbol{\beta})' \mathbf{W} \mathbf{K}^* \mathbf{W} (\mathbf{y}^* - \mathbf{X}\boldsymbol{\beta}). \quad (\text{S10})$$

To calculate  $Q_1$ , we just need to fit the null model  $\boldsymbol{\eta} = \mathbf{X}\boldsymbol{\beta}$ , and substitute  $\mathbf{y}^*$ ,  $\boldsymbol{\beta}$  and  $\mathbf{W}$  with their consistent estimates.

When developing MiRKAT-MCO using the same framework, the assumptions that  $\boldsymbol{\beta}_j$  are identical and  $\alpha_1 < \dots < \alpha_{J-1}$  are applied into all the relevant models. We substitute the link function in model S1 with the logit function, and substitute  $\pi_{ji}$ ,  $y_{ji}$  with the cumulative probability  $\nu_{ji} = \sum_{h=1}^j \pi_{hi}$  and the cumulative response  $\tilde{y}_{ji} = \sum_{h=1}^j y_{hi}$ , respectively. Hence,  $E(e_{ji}|\nu_{ji}) = 0$ ,  $\text{Var}(e_{ji}|\nu_{ji}) = \nu_{ji}(1 - \nu_{ji})$ , and  $\text{Cov}(e_{ji}, e_{hi}|\nu_{ji}, \nu_{hi}) = \nu_{ji}(1 - \nu_{hi})$ ,  $h > j$ .  $\mathbf{D}_\nu$  is the inverse of  $\mathbf{V}_\nu = \text{Var}(\mathbf{e}|\boldsymbol{\nu})$ .

## 1.2 MiRKAT-MC for clustered data

The development of MiRKAT-MC for clustered data is fairly similar to that for independent data. We just need to add another random effect to capture the correlation within clusters. Again, we take MiRKAT-MCN for example and the some details of MiRKAT-MCO will be introduced at the end of this section. Let  $y_{jik}$ , an indicator denote whether the  $k$ -th observation of the  $i$ -th cluster belongs to the  $j$ -th category, where  $k = 1, \dots, m_i$ ,  $i = 1, \dots, n$  and  $j = 1, \dots, J$ . Let  $N = \sum_i m_i$  indicate the total number of observations. Suppose we have the following models

$$\eta_{jik} = \log \frac{\pi_{jik}}{1 - \sum_{j=1}^{J-1} \pi_{jik}} = \alpha_j + \mathbf{x}'_{ik} \boldsymbol{\beta}_j + \mathbf{u}'_{ik} \mathbf{b}_{ji} + h_{jik}, \quad (\text{S11})$$

and

$$y_{jik} = \pi_{jik} + e_{jik}, \quad (\text{S12})$$

where  $\pi_{jik} = E(y_{jik} | \mathbf{b}_{ji}, h_{jik})$ ;  $\mathbf{x}_{ik} = (x_{ik1}, \dots, x_{ikq})'$  denote covariates and  $\alpha_j$  and  $\boldsymbol{\beta}_j = (\beta_{j1}, \dots, \beta_{jq})'$  are corresponding intercept and coefficients for the fixed effect. We introduce a random variable  $\mathbf{b}_{ji}$  to measure the correlation between observations within cluster  $i$  of category  $j$ .  $\mathbf{u}_{ik}$  are pre-specified coefficients of random effect  $\mathbf{b}_{ji}$ . We consider the model with a random intercept and a random slope in the following derivation.  $h_{jik}$  represents the effect of microbiome of  $k$ -th observation of cluster  $i$  on the category  $j$ , with the distribution  $\mathcal{N}(0, \tau K_{ik})$ .  $e_{jik}$  is an unobserved error with  $E(e_{jik} | \pi_{jik}) = 0$ ,  $\text{Var}(e_{jik} | \pi_{jik}) = \pi_{jik}(1 - \pi_{jik})$  and  $\text{Cov}(e_{jik}, e_{hik} | \pi_{jik}, \pi_{hik}) = -\pi_{jik}\pi_{hik}$ .

We skip steps from 3 to 6 in the above section, and write the model S11 in matrix notation

$$\boldsymbol{\eta} = \mathbf{X}\boldsymbol{\beta} + \mathbf{U}\mathbf{b} + \mathbf{h} \quad (\text{S13})$$

Except for  $\boldsymbol{\beta}$  and  $\mathbf{b}$ , each component in the model S13 has three levels - category, cluster, and observation. Thus, for the category level,  $\boldsymbol{\eta} = (\boldsymbol{\eta}'_1, \dots, \boldsymbol{\eta}'_{J-1})'$ ,  $\mathbf{X} = \mathbf{I}_{J-1} \otimes \begin{bmatrix} \mathbf{1}_{m_1} & \mathbf{X}_1 \\ \vdots & \vdots \\ \mathbf{1}_{m_n} & \mathbf{X}_n \end{bmatrix}$ ,  $\boldsymbol{\beta} = (\alpha_1, \boldsymbol{\beta}'_1, \dots, \alpha_{J-1}, \boldsymbol{\beta}'_{J-1})'$ ,  $\mathbf{U} = \mathbf{I}_{J-1} \otimes \text{diag}(\mathbf{U}_1, \dots, \mathbf{U}_n)$ ,  $\mathbf{b} = (\mathbf{b}'_1, \dots, \mathbf{b}'_{J-1})'$ ,  $\mathbf{h} = (\mathbf{h}'_1, \dots, \mathbf{h}'_{J-1})'$ , where  $\mathbf{1}_m$  is  $m \times 1$  vector of 1's. For the cluster level,  $\boldsymbol{\eta}_j = (\boldsymbol{\eta}'_{j1}, \dots, \boldsymbol{\eta}'_{jn})'$ ,  $\mathbf{b}_j = (\mathbf{b}'_{j1}, \dots, \mathbf{b}'_{jn})'$ ,  $\mathbf{h}_j = (\mathbf{h}'_{j1}, \dots, \mathbf{h}'_{jn})'$ . For the observation level,  $\boldsymbol{\eta}_{ji} = (\eta_{ji1}, \dots, \eta_{jim_i})'$ ,  $\mathbf{X}_i = (\mathbf{x}_{i1}, \dots, \mathbf{x}_{im_i})'$ ,  $\mathbf{U}_i = (\mathbf{u}_{i1}, \dots, \mathbf{u}_{im_i})'$ ,  $\mathbf{h}_{ji} = (h_{ji1}, \dots, h_{jim_i})'$ . And  $\mathbf{x}_{ik} = (x_{ik1}, \dots, x_{ikq})'$ ,  $\boldsymbol{\beta}_j = (\beta_{j1}, \dots, \beta_{jq})'$ ,  $\mathbf{u}_{ik} = (1, t_{ik})'$ ,  $\mathbf{b}_{ji} = (b_{ji1}, b_{ji2})'$ . We assume that  $\mathbf{b}$  and  $\mathbf{h}$  are independent, and both of them have the normal distribution,  $\mathbf{b} \sim \mathcal{N}(\mathbf{0}, \mathbf{G}^*)$  and  $\mathbf{h} \sim \mathcal{N}(\mathbf{0}, \tau \mathbf{K}^*)$ .  $\mathbf{G}^*$  is a  $(J-1) \times (J-1)$  block matrix with entries  $\mathbf{I}_n \otimes \mathbf{G}_{jh}$ ,  $j, h = 1, \dots, J-1$ , where  $\mathbf{G}_{jh}$  is a  $2 \times 2$  matrix, and  $\mathbf{K}^* = \mathbf{I}_{J-1} \otimes \mathbf{K}$ , where  $\mathbf{K}$  is an  $N \times N$  kernel matrix.

Define the working variable in matrix language as

$$\mathbf{y}^* = \mathbf{D}_\pi(\mathbf{y} - \bar{\pi}) + \bar{\boldsymbol{\eta}} = \boldsymbol{\eta} + \mathbf{D}_\pi \mathbf{e} \quad (\text{S14})$$

where  $\mathbf{D}_\pi$  is a diagonal matrix with each entry  $\bar{d}_{jik} = \frac{\bar{\pi}_{jik}\pi_{jik}}{\bar{\pi}_{jik} + \pi_{jik}}$  arranged in the same way as  $\boldsymbol{\eta}$ . The Gaussian log likelihood corresponding to the linear mixed model for  $\mathbf{y}^*$  is the following:

$$l(\boldsymbol{\beta}, \boldsymbol{\Sigma}^*; \mathbf{y}^*) = -\frac{1}{2} \log |\boldsymbol{\Sigma}^*| - \frac{N \times (J-1)}{2} \log 2\pi - \frac{1}{2} (\mathbf{y}^* - \mathbf{X}\boldsymbol{\beta})' \boldsymbol{\Sigma}^{*-1} (\mathbf{y}^* - \mathbf{X}\boldsymbol{\beta}) \quad (\text{S15})$$

where  $\Sigma^* = \mathbf{W}^{-1} + \tau \mathbf{K}^* + \mathbf{U} \mathbf{G}^* \mathbf{U}'$ . The score function in terms of  $\tau$  is

$$U(\boldsymbol{\beta}, \Sigma^*; \mathbf{y}^*) = \frac{1}{2}(\mathbf{y}^* - \mathbf{X}\boldsymbol{\beta})' \Sigma^{*-1} \mathbf{K}^* \Sigma^{*-1} (\mathbf{y}^* - \mathbf{X}\boldsymbol{\beta}) - \frac{1}{2} \text{tr}[\Sigma^{*-1} \mathbf{K}^*] \quad (\text{S16})$$

Under the null hypothesis  $H_0 : \tau = 0$ ,  $\Sigma^*$  is reduced to  $\Sigma = \mathbf{W}^{-1} + \mathbf{U} \mathbf{G}^* \mathbf{U}'$ . Therefore, the score test statistic of MiRKAT-MC for longitudinal data is

$$Q_2 = (\mathbf{y}^* - \mathbf{X}\boldsymbol{\beta})' \Sigma^{-1} \mathbf{K}^* \Sigma^{-1} (\mathbf{y}^* - \mathbf{X}\boldsymbol{\beta}) \quad (\text{S17})$$

To calculate  $Q_2$ , one just needs to fit the null model  $\boldsymbol{\eta} = \mathbf{X}\boldsymbol{\beta} + \mathbf{U}\mathbf{b}$ , and substitute  $\mathbf{y}^*$ ,  $\boldsymbol{\beta}$  and  $\Sigma$  with their consistent estimates/predictors.

When developing MiRKAT-MCO using the same framework, the assumptions that  $\boldsymbol{\beta}_j$  are identical,  $\alpha_1 < \dots < \alpha_{J-1}$ , and  $\mathbf{b}_{ji}$  are identical across categories for a fixed cluster  $i$  are applied to all relevant models. We substitute the link function in model S11 with the logit function, and substitute  $\pi_{jik}$ ,  $y_{jik}$  with the cumulative probability  $\nu_{jik} = \sum_{h=1}^j \pi_{hik}$  and the cumulative response  $\tilde{y}_{jik} = \sum_{h=1}^j y_{hik}$ , respectively. Hence,  $E(e_{jik}|\nu_{jik}) = 0$ ,  $\text{Var}(e_{jik}|\nu_{jik}) = \nu_{jik}(1 - \nu_{jik})$ , and  $\text{Cov}(e_{jik}, e_{hik}|\nu_{jik}, \nu_{hik}) = \nu_{jik}(1 - \nu_{hik})$ ,  $h > j$ .  $\mathbf{D}_\nu$  is the inverse of  $\mathbf{V}_\nu = \text{Var}(\mathbf{e}|\boldsymbol{\nu})$ .

## 2 SUPPLEMENTARY TABLES AND FIGURES

### 2.1 Tables

**Table S1.** Empirical type I error rates of MiRKAT-MC for clustered data with a random intercept and a random slope for within-cluster correlation with three category outcomes.  $n$  denotes the number of clusters while  $N$  denotes the total sample size.  $g$  is the variance of random effects.  $\mathbf{K}_w$ : the weighted UniFrac kernel;  $\mathbf{K}_u$ : the unweighted UniFrac kernel;  $\mathbf{K}_{BC}$ : the Bray-Curtis kernel;  $\mathbf{K}_5$ : the generalized UniFrac kernel with parameter 0.5; HMP: the omnibus test using harmonic mean  $p$  value test.

| $g$               | $n = 30 (N = 105)$ |        |        | $n = 60 (N = 210)$ |        |        |
|-------------------|--------------------|--------|--------|--------------------|--------|--------|
|                   | 0.25               | 1      | 4      | 0.25               | 1      | 4      |
| MiRKAT-MCN        |                    |        |        |                    |        |        |
| $\mathbf{K}_w$    | 0.0470             | 0.0476 | 0.0441 | 0.0464             | 0.0472 | 0.0464 |
| $\mathbf{K}_u$    | 0.0538             | 0.0519 | 0.0501 | 0.0525             | 0.0515 | 0.0516 |
| $\mathbf{K}_{BC}$ | 0.0478             | 0.0453 | 0.0503 | 0.0497             | 0.0462 | 0.0497 |
| $\mathbf{K}_5$    | 0.0494             | 0.0494 | 0.0506 | 0.0486             | 0.0484 | 0.0452 |
| HMP               | 0.0478             | 0.0456 | 0.0483 | 0.0479             | 0.0480 | 0.0462 |
| MiRKAT-MCO        |                    |        |        |                    |        |        |
| $\mathbf{K}_w$    | 0.0444             | 0.0443 | 0.0523 | 0.0492             | 0.0439 | 0.0445 |
| $\mathbf{K}_u$    | 0.0528             | 0.0524 | 0.0498 | 0.0494             | 0.0501 | 0.0463 |
| $\mathbf{K}_{BC}$ | 0.0493             | 0.0503 | 0.0501 | 0.0513             | 0.0504 | 0.0477 |
| $\mathbf{K}_5$    | 0.0491             | 0.0484 | 0.0548 | 0.0484             | 0.0507 | 0.0494 |
| HMP               | 0.0473             | 0.0466 | 0.0463 | 0.0481             | 0.0476 | 0.0475 |

### 2.2 Figures

**Table S2.** Empirical type I error rates of MiRKAT-MC for clustered data with a random intercept and a random slope for within-cluster correlation with three-category outcomes.  $n$  indicates the number of clusters while  $N$  is the number of total observations.  $g$  denotes the variance of random effects. The definition of  $K_w$ ,  $K_u$ ,  $K_{BC}$ ,  $K_5$  and HMP is the same as Table S1.

| $g$               | $n = 30 (N = 105)$ |        |        | $n = 60 (N = 210)$ |        |        |
|-------------------|--------------------|--------|--------|--------------------|--------|--------|
|                   | 0.25               | 1      | 4      | 0.25               | 1      | 4      |
| <b>MiRKAT-MCN</b> |                    |        |        |                    |        |        |
| $K_w$             | 0.0498             | 0.0492 | 0.0467 | 0.0478             | 0.0496 | 0.0484 |
| $K_u$             | 0.0521             | 0.0533 | 0.0486 | 0.0449             | 0.0508 | 0.0478 |
| $K_{BC}$          | 0.0519             | 0.0542 | 0.0494 | 0.0522             | 0.0478 | 0.0497 |
| $K_5$             | 0.0527             | 0.0516 | 0.0521 | 0.0521             | 0.0468 | 0.0505 |
| HMP               | 0.0514             | 0.0533 | 0.0472 | 0.0465             | 0.0478 | 0.0488 |
| <b>MiRKAT-MCO</b> |                    |        |        |                    |        |        |
| $K_w$             | 0.0500             | 0.0473 | 0.0474 | 0.0449             | 0.0498 | 0.0457 |
| $K_u$             | 0.0486             | 0.0506 | 0.0487 | 0.0483             | 0.0483 | 0.0538 |
| $K_{BC}$          | 0.0535             | 0.0507 | 0.0487 | 0.0453             | 0.0493 | 0.0485 |
| $K_5$             | 0.0519             | 0.0471 | 0.0489 | 0.0476             | 0.0501 | 0.0486 |
| HMP               | 0.0495             | 0.0467 | 0.0481 | 0.0452             | 0.0483 | 0.0475 |

**Table S3.** Empirical type I error rates of MiRKAT-MC for clustered data with a random intercept with five-category outcomes.  $n$  denotes the number of clusters while  $N$  denotes the total sample size.  $g$  is the variance of random effects. The definition of  $K_w$ ,  $K_u$ ,  $K_{BC}$ ,  $K_5$  and HMP is the same as Table S1.

| $g$               | $n = 50 (N = 175)$ |        |        | $n = 100 (N = 350)$ |        |        |
|-------------------|--------------------|--------|--------|---------------------|--------|--------|
|                   | 0.25               | 1      | 4      | 0.25                | 1      | 4      |
| <b>MiRKAT-MCN</b> |                    |        |        |                     |        |        |
| $K_w$             | 0.0495             | 0.0487 | 0.0480 | 0.0416              | 0.0417 | 0.0454 |
| $K_u$             | 0.0473             | 0.0510 | 0.0519 | 0.0542              | 0.0470 | 0.0501 |
| $K_{BC}$          | 0.0524             | 0.0490 | 0.0521 | 0.0462              | 0.0454 | 0.0469 |
| $K_5$             | 0.0528             | 0.0491 | 0.0499 | 0.0476              | 0.0495 | 0.0513 |
| HMP               | 0.0492             | 0.0490 | 0.0469 | 0.0450              | 0.0435 | 0.0483 |
| <b>MiRKAT-MCO</b> |                    |        |        |                     |        |        |
| $K_w$             | 0.0439             | 0.0450 | 0.0481 | 0.0430              | 0.0412 | 0.0466 |
| $K_u$             | 0.0481             | 0.0525 | 0.0479 | 0.0505              | 0.0541 | 0.0522 |
| $K_{BC}$          | 0.0460             | 0.0474 | 0.0477 | 0.0494              | 0.0455 | 0.0499 |
| $K_5$             | 0.0517             | 0.0500 | 0.0496 | 0.0471              | 0.0450 | 0.0517 |
| HMP               | 0.0460             | 0.0500 | 0.0463 | 0.0438              | 0.0459 | 0.0480 |

**Table S4.** Empirical type I error rates of MiRKAT-MC for clustered data with a random intercept and a random slope with five-category outcomes.  $n$  denotes the number of clusters while  $N$  denotes the total sample size.  $g$  is the variance of random effects. The definition of  $K_w$ ,  $K_u$ ,  $K_{BC}$ ,  $K_5$  and HMP is the same as Table S1.

| $g$               | $n = 50 (N = 175)$ |        |        | $n = 100 (N = 350)$ |        |        |
|-------------------|--------------------|--------|--------|---------------------|--------|--------|
|                   | 0.25               | 1      | 4      | 0.25                | 1      | 4      |
| <b>MiRKAT-MCN</b> |                    |        |        |                     |        |        |
| $K_w$             | 0.0489             | 0.0491 | 0.0472 | 0.0480              | 0.0458 | 0.0494 |
| $K_u$             | 0.0489             | 0.0503 | 0.0460 | 0.0493              | 0.0515 | 0.0482 |
| $K_{BC}$          | 0.0452             | 0.0419 | 0.0420 | 0.0496              | 0.0511 | 0.0484 |
| $K_5$             | 0.0492             | 0.0490 | 0.0525 | 0.0469              | 0.0488 | 0.0507 |
| HMP               | 0.0487             | 0.0452 | 0.0446 | 0.0467              | 0.0457 | 0.0483 |
| <b>MiRKAT-MCO</b> |                    |        |        |                     |        |        |
| $K_w$             | 0.0477             | 0.0449 | 0.0436 | 0.0480              | 0.0481 | 0.0478 |
| $K_u$             | 0.0495             | 0.0513 | 0.0530 | 0.0480              | 0.0507 | 0.0524 |
| $K_{BC}$          | 0.0471             | 0.0486 | 0.0494 | 0.0491              | 0.0518 | 0.0471 |
| $K_5$             | 0.0521             | 0.0523 | 0.0464 | 0.0465              | 0.0528 | 0.0527 |
| HMP               | 0.0452             | 0.0509 | 0.0436 | 0.0489              | 0.0516 | 0.0475 |

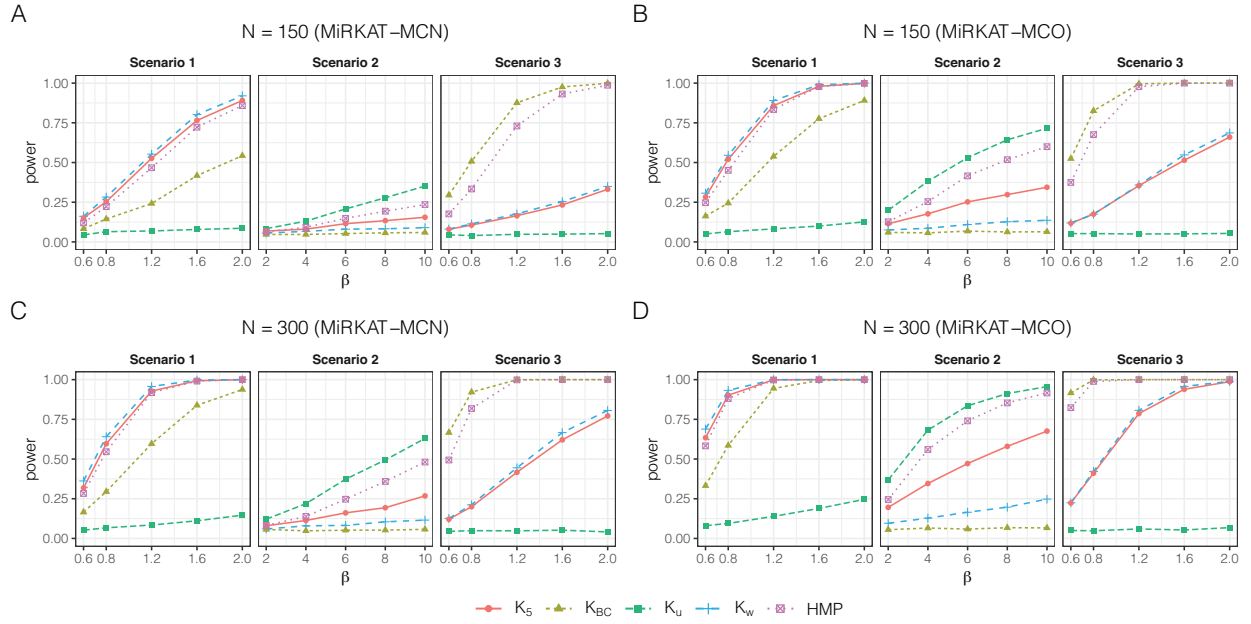

**Figure S1.** Statistical powers of MiRKAT-MC for independent data with five categories. Scenario 1:  $\mathcal{A} = \{\text{A random selected common cluster among 20 clusters by PAM}\}$ ; Scenario 2:  $\mathcal{A} = \{\text{The rarest cluster among 20 clusters by PAM}\}$ ; Scenario 3:  $\mathcal{A} = \{\text{10 most abundant OTUs}\}$ .  $K_w$ : the weighted UniFrac kernel;  $K_u$ : the unweighted UniFrac kernel;  $K_5$ : the generalized UniFrac kernel with parameter 0.5; HMP: the omnibus test using harmonic mean  $p$  value test. (A) MiRKAT-MCN with 150 total samples; (B) MiRKAT-MCO with 150 total samples; (C) MiRKAT-MCN with 300 total samples; (D) MiRKAT-MCO with 300 total samples.

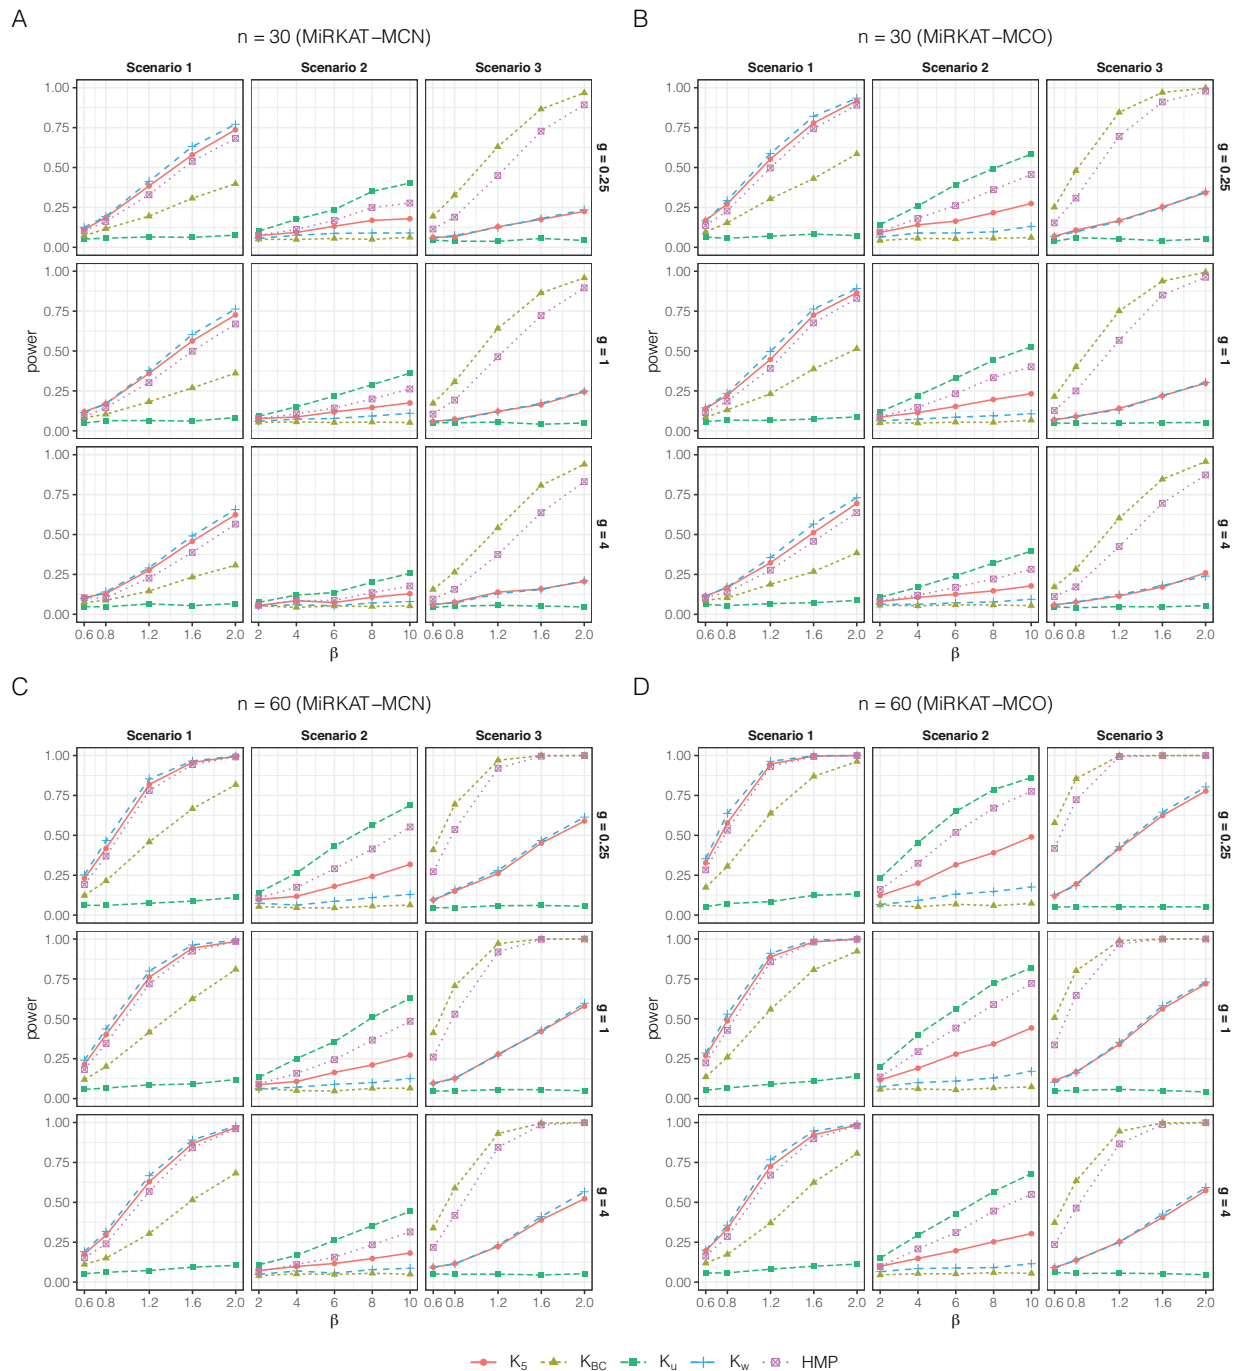

**Figure S2.** Statistical powers of MiRKAT-MC for clustered data with a random intercept model with three-category data.  $g$  denotes the variance of random effects. The definition of scenarios and  $K_w$ ,  $K_u$ ,  $K_{BC}$ ,  $K_5$  and HMP are the same as Figure S1. (A) MiRKAT-MCN with 30 clusters (105 total samples); (B) MiRKAT-MCO with 30 clusters (105 total samples); (C) MiRKAT-MCN with 60 clusters (210 total samples); (D) MiRKAT-MCO with 60 clusters (210 total samples).

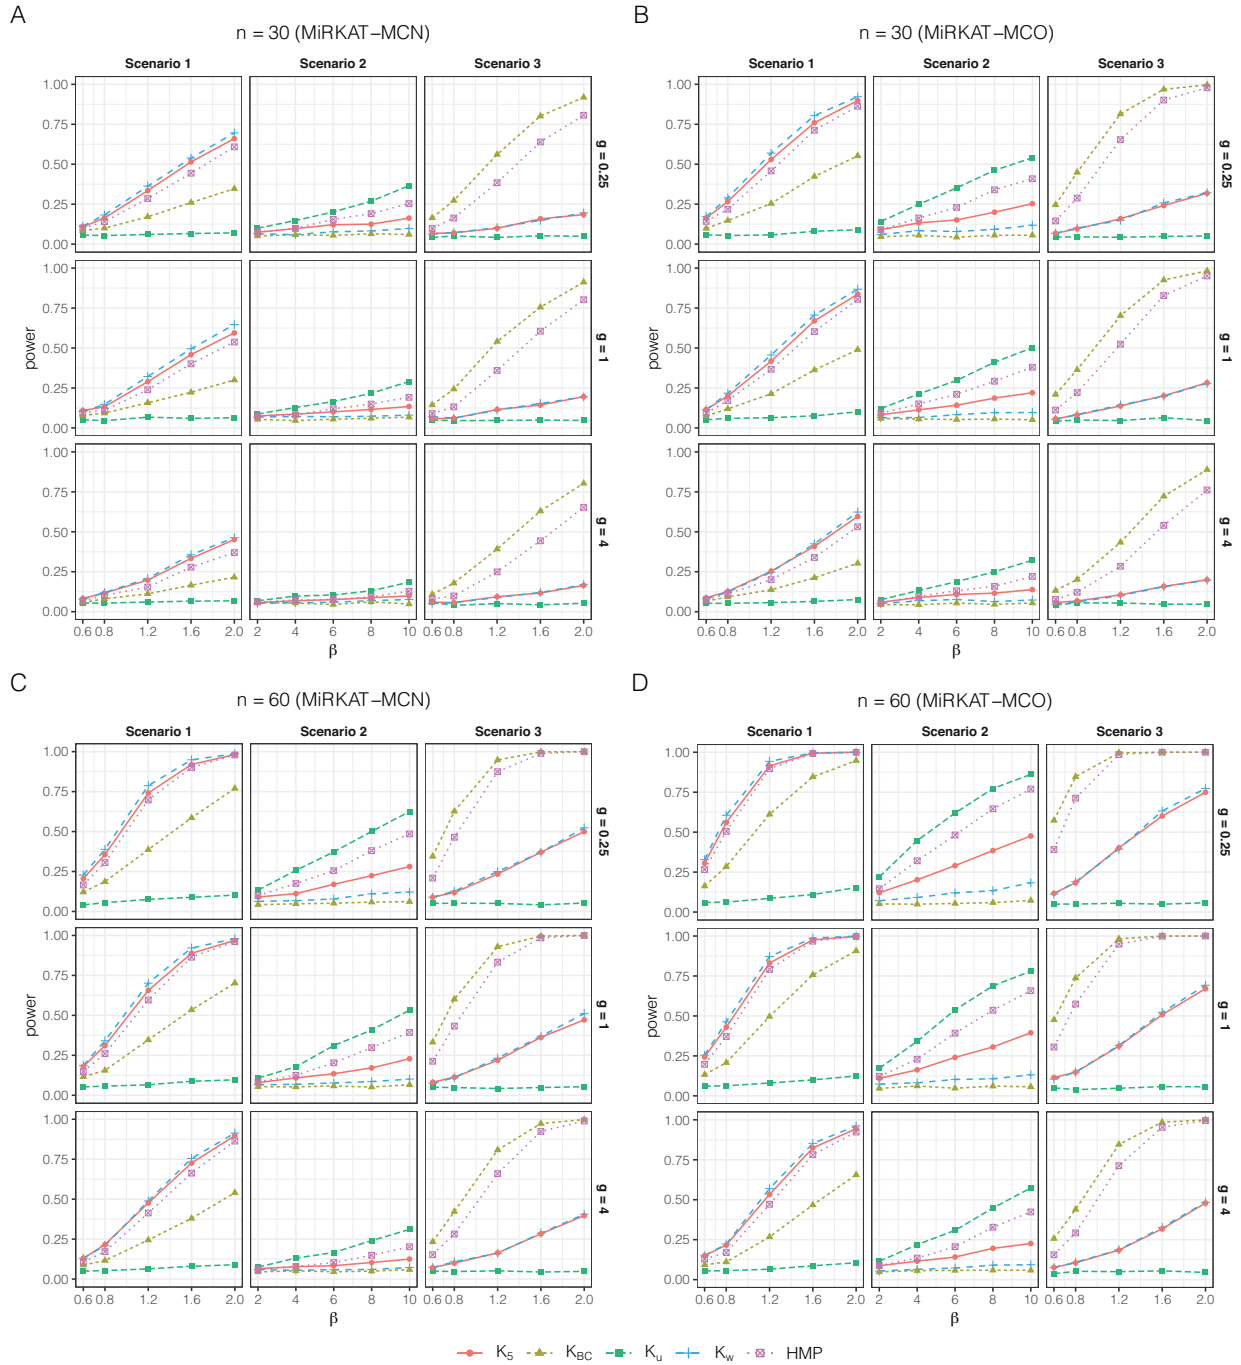

**Figure S3.** Statistical powers of MiRKAT-MC for clustered data with a random intercept and a random slope model with three-category data.  $g$  denotes the variance of random effects. The definition of  $K_w$ ,  $K_u$ ,  $K_{BC}$ ,  $K_5$  and HMP is the same as Figure S1. (A) MiRKAT-MCN with 30 clusters (105 total samples); (B) MiRKAT-MCO with 30 clusters (105 total samples); (C) MiRKAT-MCN with 60 clusters (210 total samples); (D) MiRKAT-MCO with 60 clusters (210 total samples).



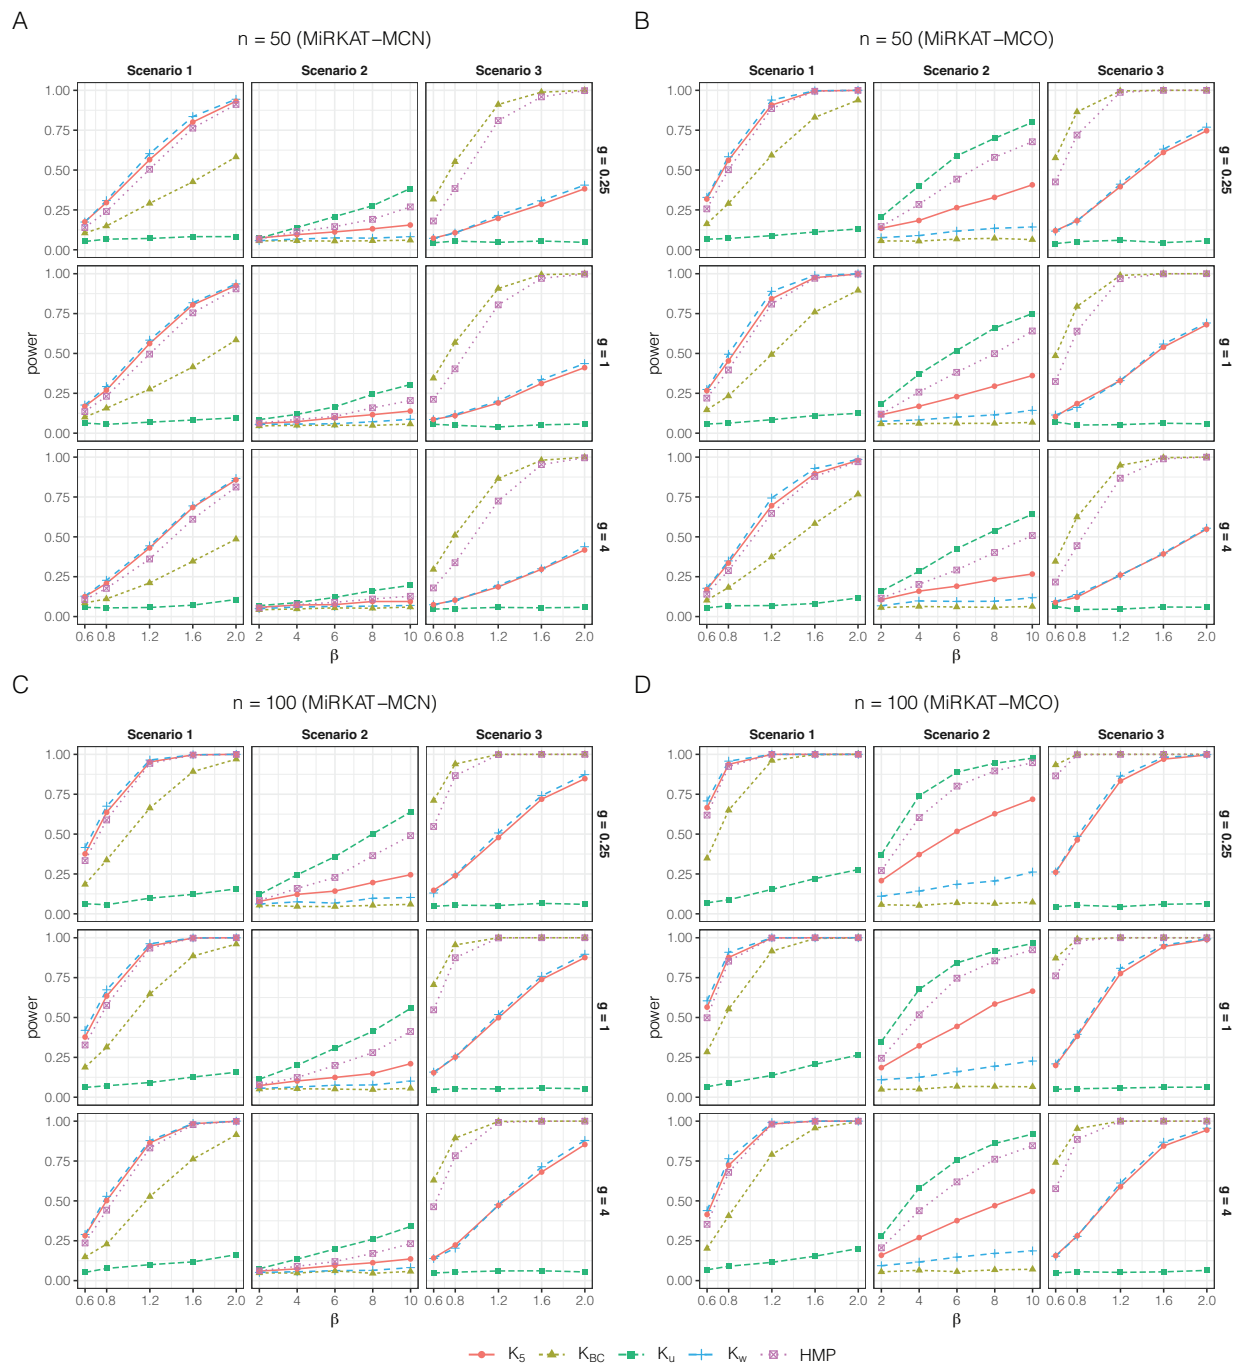

**Figure S4.** Statistical powers of MiRKAT-MC for clustered data with a random intercept model with five-category data.  $g$  denotes the variance of random effects. The definition of scenarios and  $K_w$ ,  $K_u$ ,  $K_{BC}$ ,  $K_5$  and HMP are the same as Figure S1. (A) MiRKAT-MCN with 50 clusters (175 total samples); (B) MiRKAT-MCO with 50 clusters (175 total samples); (C) MiRKAT-MCN with 100 clusters (350 total samples); (D) MiRKAT-MCO with 100 clusters (350 total samples).

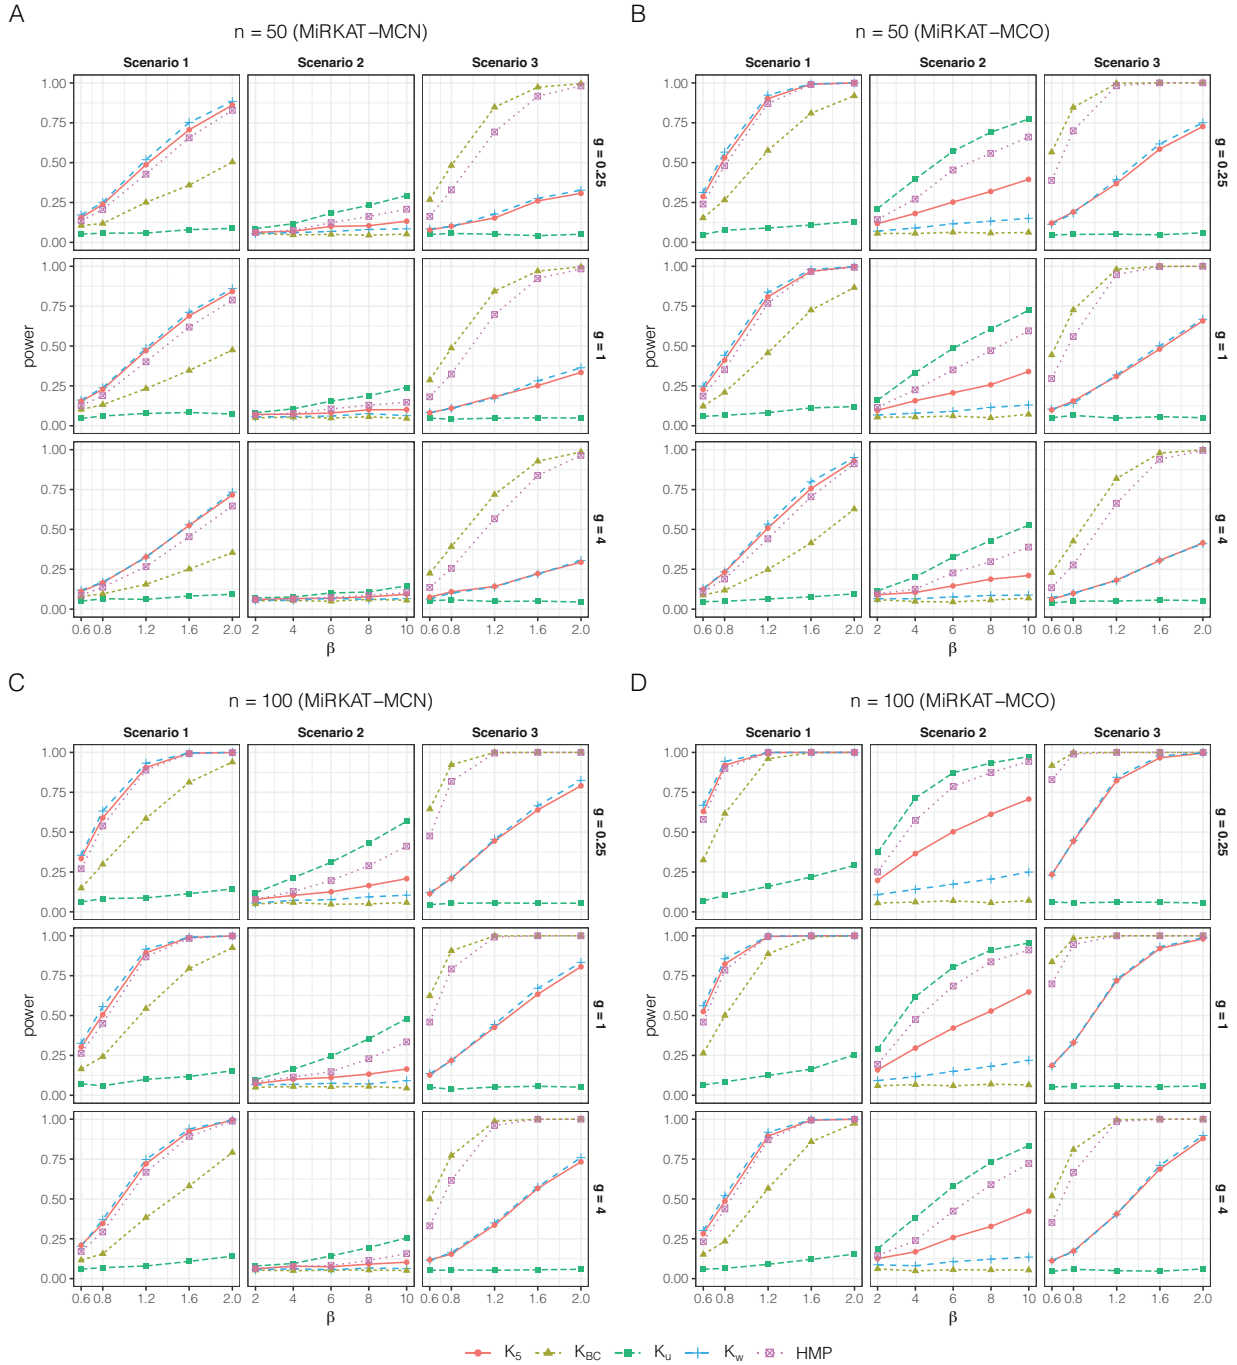

**Figure S5.** Statistical powers of MiRKAT-MC for clustered data with a random intercepts and a random slope model with five-category data.  $g$  denotes the variance of random effects. The definition of scenarios and  $K_w$ ,  $K_u$ ,  $K_{BC}$ ,  $K_5$  and HMP are the same as Figure S1. (A) MiRKAT-MCN with 50 clusters (175 total samples); (B) MiRKAT-MCO with 50 clusters (175 total samples); (C) MiRKAT-MCN with 100 clusters (350 total samples); (D) MiRKAT-MCO with 100 clusters (350 total samples).
